# 1 NOTE

## 2 Virology

### 3 Identification of domestic cat hepadnavirus from a cat blood sample in Japan

4

5 Kazuki Takahashi<sup>1)</sup>, Yasuyuki Kaneko<sup>2)\*</sup>, Akiko Shibana<sup>3)</sup>, Shushi Yamamoto<sup>2)</sup>, Ayana Katagiri<sup>3)</sup>,

6 Tatsuyuki Osuga<sup>4)</sup>, Yoshiyuki Inoue<sup>5)</sup>, Kohei Kuroda<sup>5)</sup>, Mika Tanabe<sup>6)</sup>, Tamaki Okabayashi<sup>1), 7)</sup>,

7 Kiyokazu Naganobu<sup>2)</sup>, Isao Minobe<sup>8)</sup>, Akatsuki Saito<sup>1), 7)\*</sup>

8

9 <sup>1)</sup>Laboratory of Veterinary Microbiology, Department of Veterinary Science, Faculty of Agriculture,

10 University of Miyazaki, Miyazaki 889-2192, Japan

11 <sup>2)</sup> Veterinary Teaching Hospital, Faculty of Agriculture, University of Miyazaki, Miyazaki 889-2192,

12 Japan

13 <sup>3)</sup>Akasaka Animal Hospital, Tokyo 107-0052, Japan

14 <sup>4)</sup>Laboratory of Veterinary Internal Medicine, Department of Veterinary Science, Faculty of

15 Agriculture, University of Miyazaki, Miyazaki 889-2192, Japan

16 <sup>5)</sup>Laboratory of Veterinary Surgery, Department of Veterinary Science, Faculty of Agriculture,

17 University of Miyazaki, Miyazaki 889-2192, Japan

18 <sup>6)</sup>Veterinary Pathology Diagnostic Center, Fukuoka 809-0011, Japan

19 <sup>7)</sup>Center for Animal Disease Control, University of Miyazaki, Miyazaki 889-2192, Japan

20 <sup>8)</sup> Ain Animal Hospital, Osaka 565-0851, Japan

21

22 \*Addresses correspondence to

23 Yasuyuki Kaneko (yasuyuki-kaneko@cc.miyazaki-u.ac.jp) or Akatsuki Saito

24 (sakatsuki@cc.miyazaki-u.ac.jp)

25

26 Running head: IMPACT OF DCH ON HEPATIC DISEASES IN DOMESTIC CATS

27

28    **ABSTRACT**

29    The hepatitis B virus (*Hepadnaviridae*) induces chronic hepatitis and hepatic cancer in humans. A  
 30    novel domestic cat hepadnavirus (DCH) was recently identified in several countries, however, the  
 31    DCH infection status of cats in Japan is unknown. Therefore, we investigated the DCH infection rate  
 32    of 139 cat samples collected in Japan. We identified one positive blood sample (0.78%) from a 17-  
 33    year-old female cat with chronically elevated alanine aminotransferase. Phylogenetic analysis  
 34    demonstrated that the DCH strain identified in this study is genetically distinct from strains in other  
 35    countries. Further investigations are required to elucidate the evolution of DCH and the impact of  
 36    DCH infection on hepatic diseases in domestic cats.

37

38    **KEY WORDS:** domestic cat hepadnavirus (DCH), hepatic virus, pet cats

## 39 Main text

40 Hepatitis B virus (HBV) (*Hepadnaviridae*) is one of the causative agents of chronic hepatitis and  
 41 hepatocellular carcinoma. Despite effective vaccines against HBV, over 350 million people worldwide  
 42 are chronically infected with HBV [1]. One step in the life cycle of HBV involves the conversion of  
 43 viral pregenomic RNA to a relaxed circular DNA; therefore, several reverse transcriptase inhibitors in  
 44 combination with interferons are currently used for controlling HBV infection [2].

45 It has been unclear whether other mammals can be infected by similar hepadnaviruses that  
 46 induce chronic hepatitis and hepatocellular carcinoma. In 2018, an Australian group identified a novel  
 47 feline hepadnavirus, the domestic cat hepadnavirus (DCH), and since then, it has been detected in cats  
 48 in several countries including Australia (6.5% of tested samples) [3] and Italy (10.8% of tested  
 49 samples) [4]. Although it remains unclear whether DCH can induce hepatic diseases in cats, the  
 50 detection of DCH has been associated with chronic hepatitis and hepatocellular carcinoma [5]. In  
 51 addition, cats infected with the feline immunodeficiency virus (FIV) also tend to be positive for DCH  
 52 [3], suggesting that immunodeficiency induced by FIV may lead to infection with DCH.

53 The fact that DCH has been discovered in several countries suggests that it is prevalent  
 54 worldwide. Phylogenetic analyses in previous studies suggest that DCH is divergent among strains  
 55 from different countries, suggesting that DCH has been evolving in each country. So far, DCH has  
 56 been identified Australia [3], Thailand [6], Italy [5], the United Kingdom [7], and Malaysia [8]. Its  
 57 presence and prevalence in Japan, however, remains undetermined. In this study, therefore, we  
 58 investigated the presence and prevalence of DCH in Japan.

59 We screened 139 blood samples collected from several clinics in Japan. The blood samples  
 60 were collected from cats that were mainly housed indoors. We used samples that were rest of blood  
 61 testing for diagnosis. Prior to testing for DCH, we obtained the owner's informed consent. This study  
 62 was approved by the Animal Experiment Committee of the University of Miyazaki (authorization  
 63 number: 2021-019). All experiments were performed in accordance with relevant guidelines and  
 64 regulations.

65 All collected blood samples were mixed with the anticoagulants, heparin or ethylenedinitrilo-

66 tetraacetic acid disodium (EDTA/2Na). Previous studies have demonstrated that heparin inhibits PCR [9], thus  
 67 we used a KOD One PCR Master Mix (TOYOBO, Osaka, Japan), which is relatively tolerant to heparin  
 68 contamination. To check the quality of the PCR, we used primer pairs to amplify the cat glyceraldehyde-3-  
 69 phosphate dehydrogenase (*Gapdh*) housekeeping gene. The primers used to amplify the DCH genome are  
 70 DCH-F: (5'-ATTCAAGCGCTCTATGAAGAGG-3') and DCH-R: (5'-AAAAGTGAGGCAAGAGAGATGG-  
 71 3'), while those used to amplify cat *Gapdh* are GAPDH-F: (5'-CCTTCATTGACCTCAACTACAT-3') and  
 72 GAPDH-R: (5'-CCCCAGTAGACTCCACAACATAC-3'). The PCR conditions were 40 cycles of 98°C for  
 73 10 sec, 60°C for 5 sec, and 68°C for 10 sec, followed by 68°C for 7 min. We used a synthesized DNA  
 74 fragment encoding the partial DCH genome (Eurofins) as a positive control for DCH. The amplicons were  
 75 visualized on a 1.5% agarose gel.

76 We detected *Gapdh* amplicons from the 129 samples tested. A single sample (#116) (0.78% of  
 77 tested samples) was positive for DCH (**Figure 1**). We then sequenced the entire viral genome using  
 78 six pairs of primers whose sequences are listed in **Table 1**. We designed the primers on the Primer3  
 79 website (<https://bioinfo.ut.ee/primer3-0.4.0/>). All six fragments were efficiently amplified. Each  
 80 amplicon was run on an agarose gel and then extracted from the gel with QIAquick Gel Extraction Kit  
 81 (Qiagen, Tokyo, Japan). The sequences of the amplicons were determined using a BigDye Terminator  
 82 v3.1 Cycle Sequencing Kit (Thermo Fisher Scientific) on an Applied Biosystems 3130xl DNA  
 83 Analyzer (Thermo Fisher Scientific). The sequence assembly was performed with 4Peaks  
 84 (Nucleobytes) and Microsoft Word 2019 (Microsoft). The assembled sequence was deposited in  
 85 GenBank (Accession# LC668427).

86 The sequence of our strain was aligned with those of 15 other DCH strains and the sequences  
 87 were analyzed phylogenetically using MEGA X (MEGA Software). Our phylogenetic analysis  
 88 revealed that the amino acid sequences of the polymerase, surface, and core proteins of Domestic cat  
 89 hepadnavirus Japan/KT116/2021 were genetically close to those of previously reported strains  
 90 (**Figure 2**). In contrast, the amino acid sequence of the X protein of Domestic cat hepadnavirus  
 91 Japan/KT116/2021 was distinct from those of other strains. The X protein of HBV (HBx) plays roles

in silencing host antiviral defenses and promoting viral transcription [10, 11]. Therefore, it will be important to elucidate the impact of polymorphism in the DCH X protein.

The source of the DCH-positive sample (#116) was a 17-year-old female cat (Cat #116) born in Japan and with no record of traveling overseas. Therefore, Cat #116 was likely infected with DCH in Japan. At the time of the PCR test, Cat #116 had no health problems, based on interviews and physical examinations. However, prior to its death due to acute neuropathy, we observed a persistent elevation of alanine aminotransferase (ALT) (**Figure 3**). Moreover, Cat #116 underwent a splenectomy one year before the PCR test, and was then diagnosed with a mast cell tumor. After this diagnosis, the cat was treated with CCNU, an anticancer drug. While we cannot exclude the possibility that the treatments against the mast cell tumor induced elevated levels of ALT, it is also possible that DCH infection had affected the health status of Cat #116. Currently, it is not known whether the mast cell tumor itself or the treatments against mast cell tumor had induced immunosuppression in Cat #116, leading to infection with DCH. As Cat #116 was tested positive for DCH after its death, we were unable to perform an autopsy. Note that Cat #116 was negative for FIV and feline leukemia virus (FeLV).

In conclusion, to the best of our knowledge, this is the first time that DCH has been detected in a cat in Japan. The prevalence of DCH in this study (0.78%) is lower than those of previous studies in other countries [3, 4]. Further investigation is required to determine the reason for this difference. The results of phylogenetic analysis of the X protein reveal that Domestic cat hepadnavirus Japan/KT116/2021 is genetically distinct from previously described strains from other countries, suggesting that Domestic cat hepadnavirus Japan/KT116/2021 is a strain native to Japan. Because homologous recombination has been reported with HBV [12, 13] or DCH [6], it is important to monitor the infection status and evolutionary history of DCH in every country with a large domestic cat population. Also, the impact of DCH infection on chronic hepatitis in cats should be elucidated.

119     **CONFLICTS OF INTEREST**

120     The authors declare no conflict of interest.

121

122     **ACKNOWLEDGMENTS**

123     This work was supported by grants from Japan Society for the Promotion of Science (JSPS)

124     KAKENHI Grant-in-Aid for Scientific Research (C) 19K06382 (to AS); KAKENHI Grant-in-Aid for

125     Scientific Research (B) 21H02361 (to TO and AS); and from a Grant for Joint Research Projects of

126     the Research Institute for Microbial Diseases, Osaka University (to AS). We thank Tomoko Nishiuchi

127     for her support.

128

## REFERENCES

1. de Martel, C., Maucourt-Boulch, D., Plummer, M., and Franceschi, S. 2015. World-wide relative contribution of hepatitis B and C viruses in hepatocellular carcinoma. *Hepatology* **62**:1190–1200.
2. Lopatin, U. 2019. Drugs in the pipeline for HBV. *Clin. Liver. Dis.* **23**:535–555.
3. Aghazadeh, M., Shi, M., Barrs, V. R., McLuckie, A. J, Lindsay, S. A, Jameson, B., Hampson, B., Holmes, E. C., and Beatty, J. A. 2018. A Novel Hepadnavirus identified in an immunocompromised domestic cat in Australia. *Viruses* **10**:E269.
4. Lanave, G., Capozza, P., Diakoudi, G., Catella, C., Catucci, L., Ghergo, P., Stasi, F., Barrs, V., Beatty, J., Decaro, N., Buonavoglia, C., Martella, V., and Camero, M. 2019. Identification of hepadnavirus in the sera of cats. *Sci. Rep.* **9**:10668.
5. Pesavento, P. A., Jackson, K., Scase, T., Tse, T., Hampson, B., Munday, J. S., Barrs, V. R., and Beatty, J. A. 2019. A Novel hepadnavirus is associated with chronic hepatitis and hepatocellular carcinoma in cats. *Viruses* **11**.
6. Piewbang, C., Wardhani, S.W., Chaiyasak, S., Yostawonkul, J., Chai-In, P., Boonrungsiman, S., Kasantikul, T., and Techangamsuwan, S. 2020. Insights into the genetic diversity, recombination, and systemic infections with evidence of intracellular maturation of hepadnavirus in cats. *PLoS One* **15**:e0241212.
7. Jeanes, E. C., Wegg, M. L., Mitchell, J. A., Priestnall, S. L., Fleming, L., and Dawson, C. 2021. Comparison of the prevalence of Domestic Cat Hepadnavirus in a population of cats with uveitis and in a healthy blood donor cat population in the United Kingdom. *Vet. Ophthalmol.* <https://doi.org/10.1111/vop.12956>.
8. Anpuanandam, K., Selvarajah, G. T., Choy, M. M. K., Ng, S. W., Kumar, K., Ali, R. M., Rajendran, S. K., Ho, K. L., and Tan, W. S. 2021. Molecular detection and characterisation of

- 152 Domestic Cat Hepadnavirus (DCH) from blood and liver tissues of cats in Malaysia. *BMC Vet.*
- 153 *Res.* **17**:9.
- 154 9. Izraeli, S., Pfliegerer, C., and Lion, T. 1991. Detection of gene expression by PCR amplification of
- 155 RNA derived from frozen heparinized whole blood. *Nucl. Aci. Res.* **19**:6051.
- 156 10. Aufiero, B., Schneider, R. J. 1990. The hepatitis B virus X-gene product trans-activates both RNA
- 157 polymerase II and III promoters. *EMBO J.* **9**:497–504.
- 158 11. Slagle, B. L., Bouchard, M. J. 2016. Hepatitis B Virus X and regulation of viral gene expression.
- 159 *Cold Spring Harb. Perspect. Med.* **6**:a021402.
- 160 12. Georgi-Geisberger, P., Berns, H., Loncarevic, I. F., Yu, Z. Y., Tang, Z. Y., Zentgraf, H., Schröder,
- 161 C. H. 1992. Mutations on free and integrated hepatitis B virus DNA in a hepatocellular
- 162 carcinoma: footprints of homologous recombination. *Oncology* **49**:386–395.
- 163 13. Tran, A., Kremsdorf, D., Capel, F., Housset, C., Daugey, C., Petit, M. A., Brechot, C. 1991.
- 164 Emergence of and takeover by hepatitis B virus (HBV) with rearrangements in the pre-S/S and
- 165 pre-C/C genes during chronic HBV infection. *J.Virol.* **65**:3566.

166



## Figure legends

### **Fig. 1. PCR screening of blood samples from cats to detect the domestic cat hepadnavirus (DCH) genome**

Heparinized blood was used to amplify DCH and the cat *Gapdh* gene. Marker, N.C., and P.C. denote DNA size marker, negative control, and positive control, respectively.

### **Fig. 2. Phylogenetic analysis of DCH/Japan/KT116/2021**

The phylogenetic position of DCH Malaysia within the family *Hepadnaviridae*. The maximum likelihood tree is based on the each hepadnaviral protein sequences retrieved from the GenBank database. The Domestic cat hepadnavirus Japan/KT116/2021 (Accession# LC668427) is indicated by a red dot. The tree is drawn to scale, thus the branch lengths correspond to the number of substitutions per site.

### **Fig. 3. Changes in alanine aminotransferase (ALT) levels in Cat #116**

A plot of ALT levels in each blood test. The X-axis denotes “Days after PCR test.”

**Figure 1**

bioRxiv preprint doi: <https://doi.org/10.1101/2022.01.09.475482>; this version posted January 9, 2022. The copyright holder for this preprint (which was not certified by peer review) is the author/funder, who has granted bioRxiv a license to display the preprint in perpetuity. It is made available under aCC-BY-NC-ND 4.0 International license.

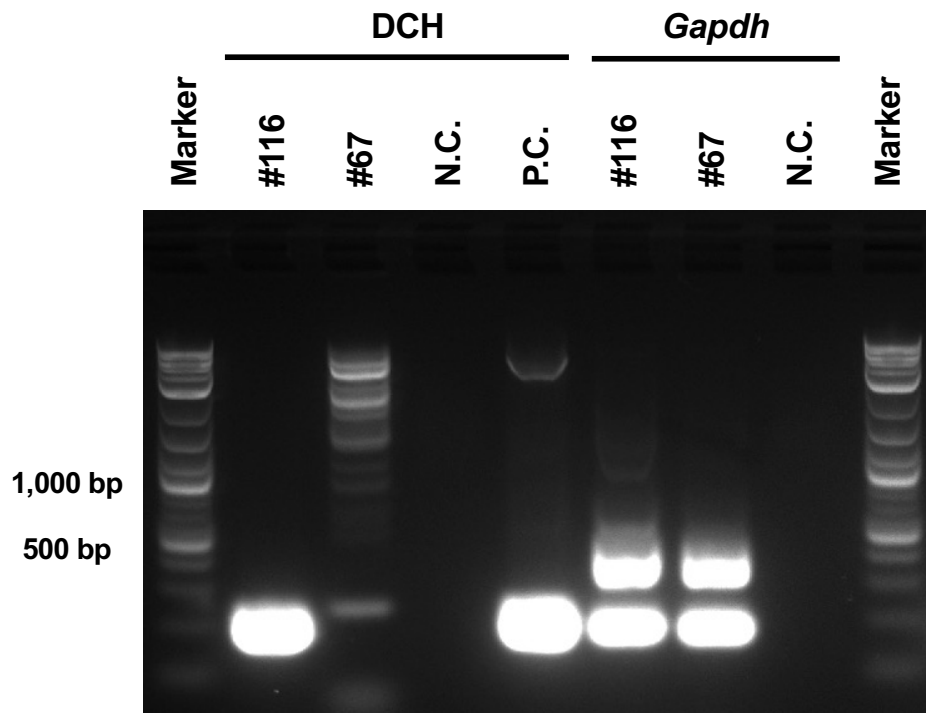

## Figure 2

bioRxiv preprint doi: <https://doi.org/10.1101/2022.01.09.475482>; this version posted January 9, 2022. The copyright holder for this preprint (which was not certified by peer review) is the author/funder, who has granted bioRxiv a license to display the preprint in perpetuity. It is made available under aCC-BY-NC-ND 4.0 International license.

### Polymerase protein

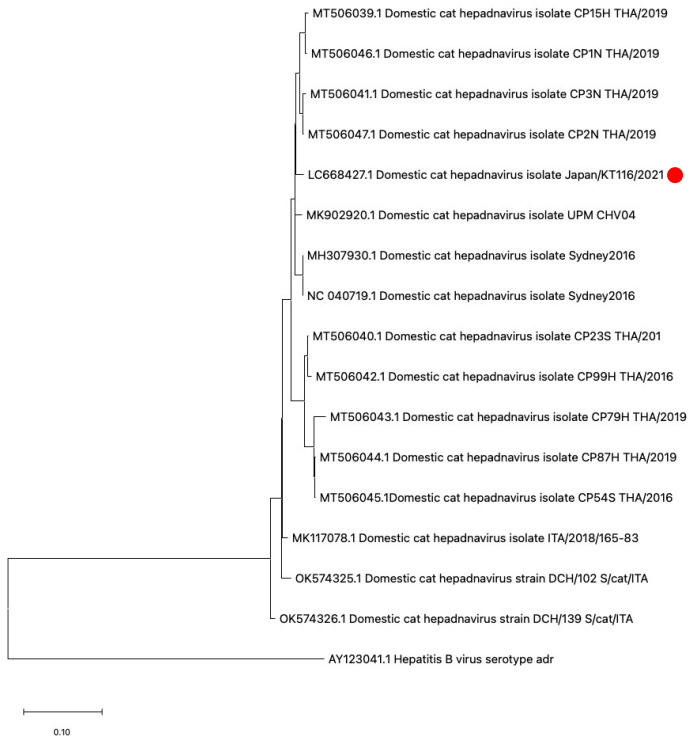

### Surface protein

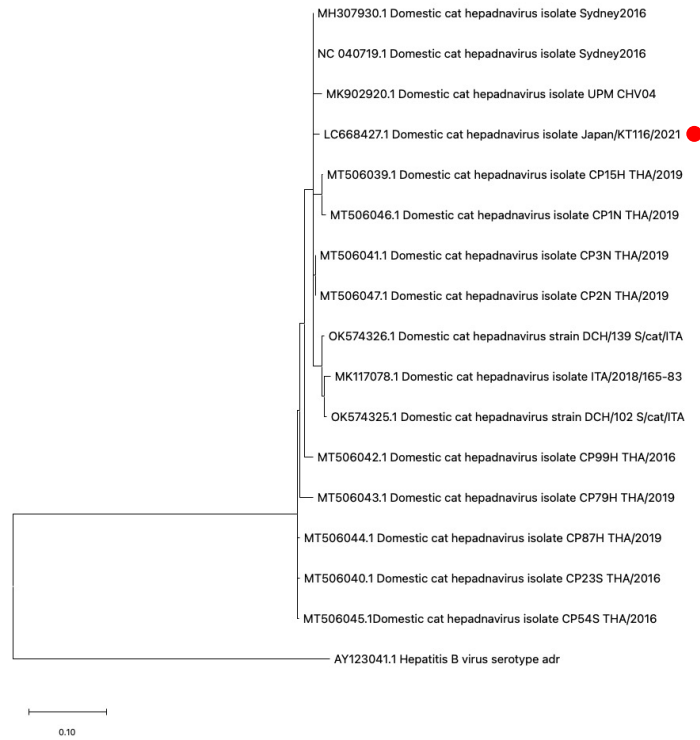

### Core protein

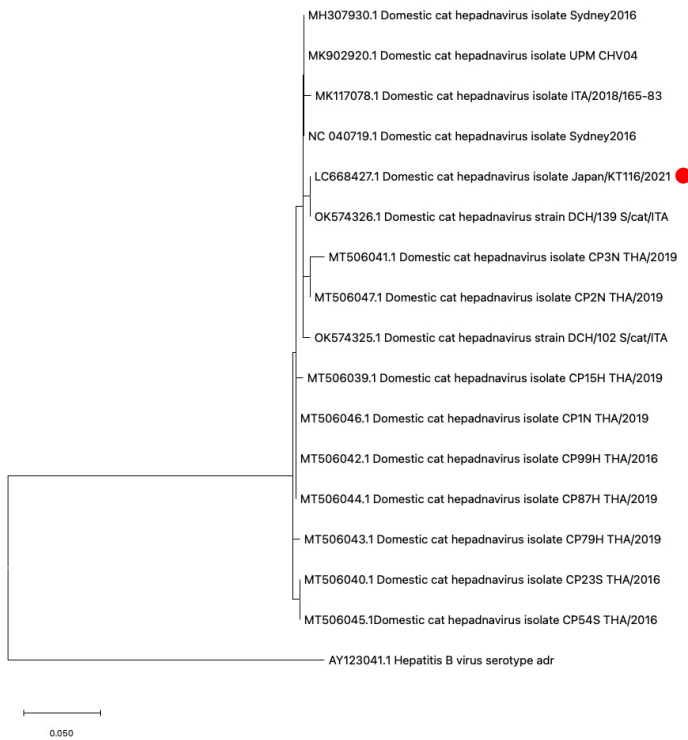

### X protein

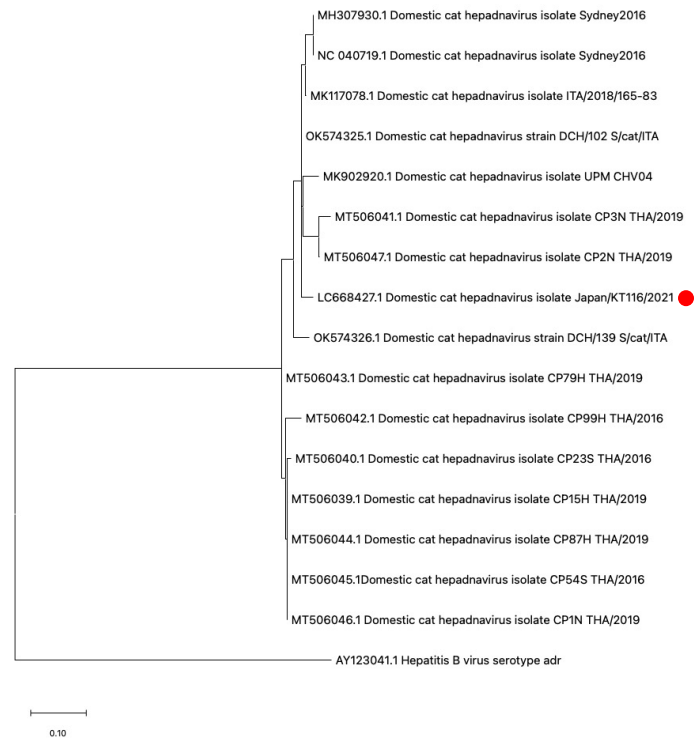

Figure 3

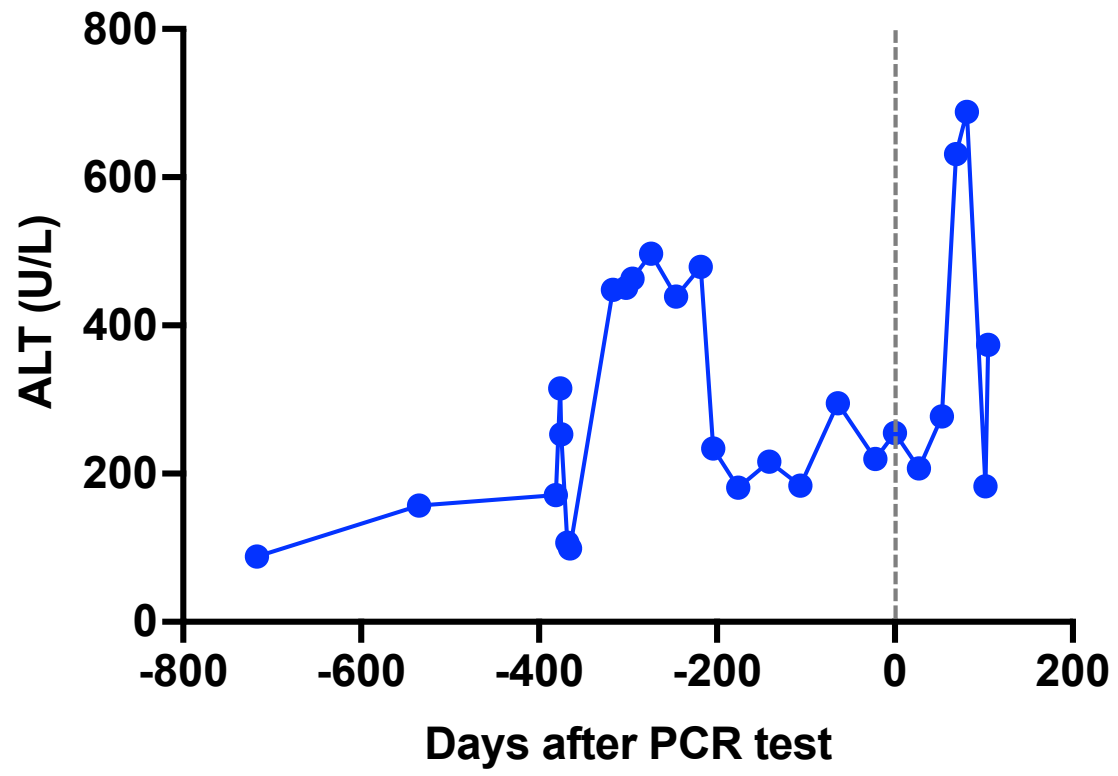

1     **TABLE 1. Primers used for determining viral whole genome**

| <b>Fragment</b> | <b>Forward primer</b>           | <b>Reverse primer</b>           |
|-----------------|---------------------------------|---------------------------------|
| <b>#1</b>       | 5'-ACTCTCAAACAGGGAACATTCGT-3'   | 5'-CATCCGACCGGAATAATAATTAAC-3'  |
| <b>#2</b>       | 5'-AATTCTCCAAAGGCTAACAGGTTTA-3' | 5'-ATTCCACCAATAGCAGATCACGTAG-3' |
| <b>#3</b>       | 5'-TACGTCCCTTCCACTCTGAATC-3'    | 5'-CAAGACAGTATGTTGTCCAAAAGTG-3' |
| <b>#4</b>       | 5'-GAAGAGGAACTTACAGGTAGGGAAC-3' | 5'-GTCTAGATTGTGACGAGGGAAAAAC-3' |
| <b>#5</b>       | 5'-CTCGATACCCTGATTATTCTCTTCA-3' | 5'-CCCTATTGTTTGTATTTTGTCCAC-3'  |
| <b>#6</b>       | 5'-CAGTTGGAGACAGAAGTACGGTTAT-3' | 5'-CATCCATATAAGCAAACACCATACA-3' |

2

3
